# Supplementary material for: Integrative Pathway Analysis of Metabolic Signature in Bladder Cancer: A Linkage to The Cancer Genome Atlas Project and Prediction of Survival
Source: PubMed Central journal article supplement (PMC4861129; doi:10.1016/j.juro.2016.01.039), 2016-06
Supplement: mmc2.pdf [file mmc2.pdf]

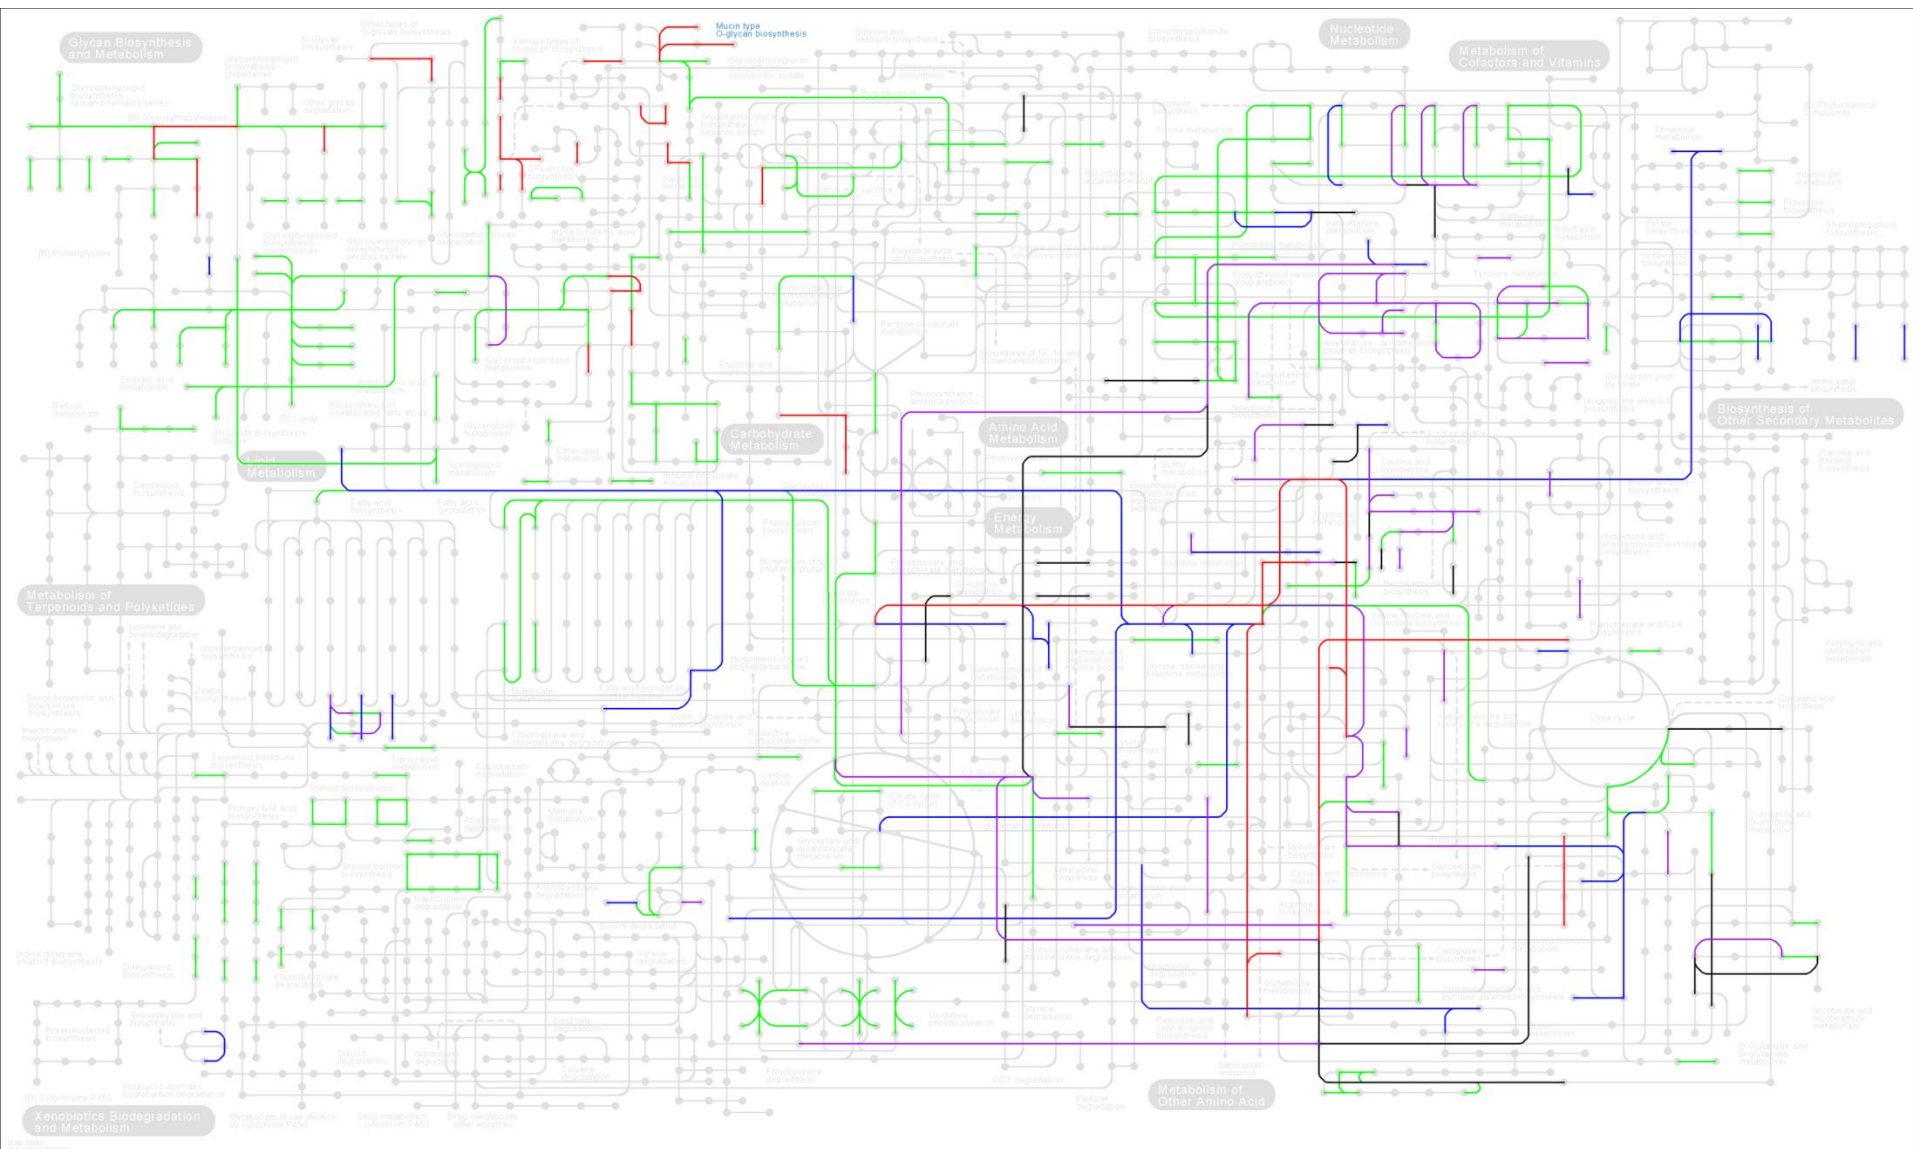

Supplementary Figure
